# Supplementary material
Source: ML conference proceedings conference paper supplement (https://openaccess.thecvf.com/content/CVPRW_2019/html/Du_Recursive_Image_Dehazing_CVPRW_2019_paper.html)
Supplement: Supplementary file 1 [file Du_Recursive_Image_Dehazing_CVPRW_2019_supplemental.pdf]

# Recursive Image Dehazing via Perceptually Optimized Generative Adversarial Network (POGAN)

# Overall architecture:

Input

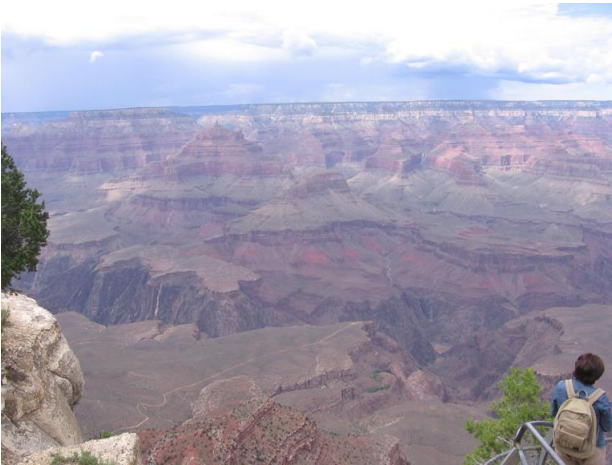

Generative (G) Network  
Only

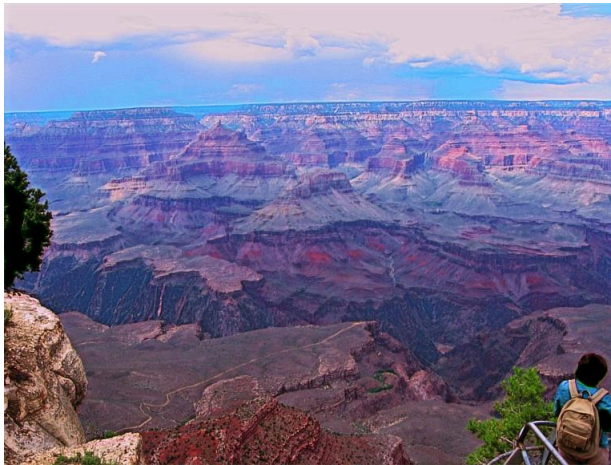

G + Discriminative (D)  
Network

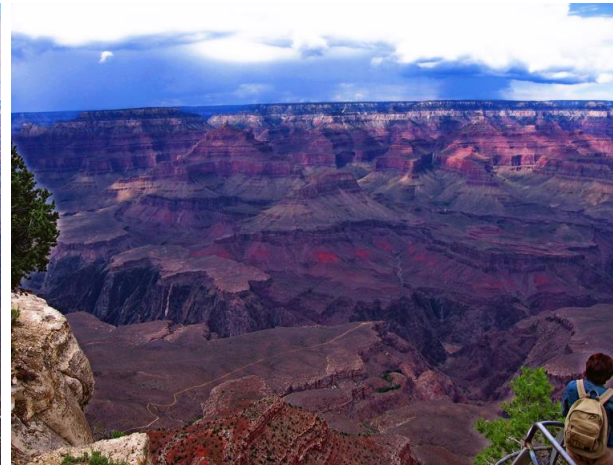

G+D+ Post-processing (H)  
Module

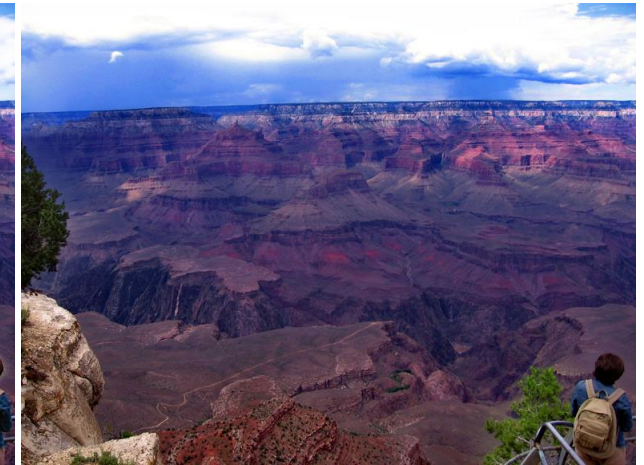

# Generative Network

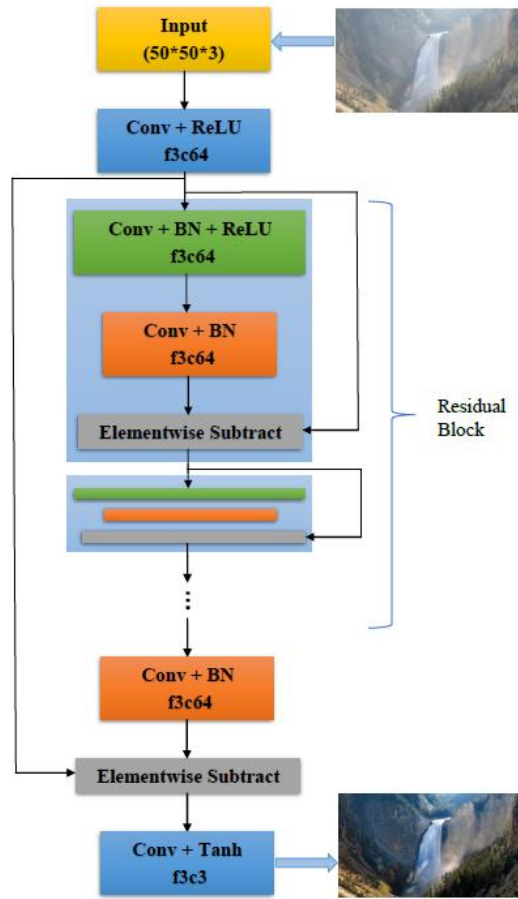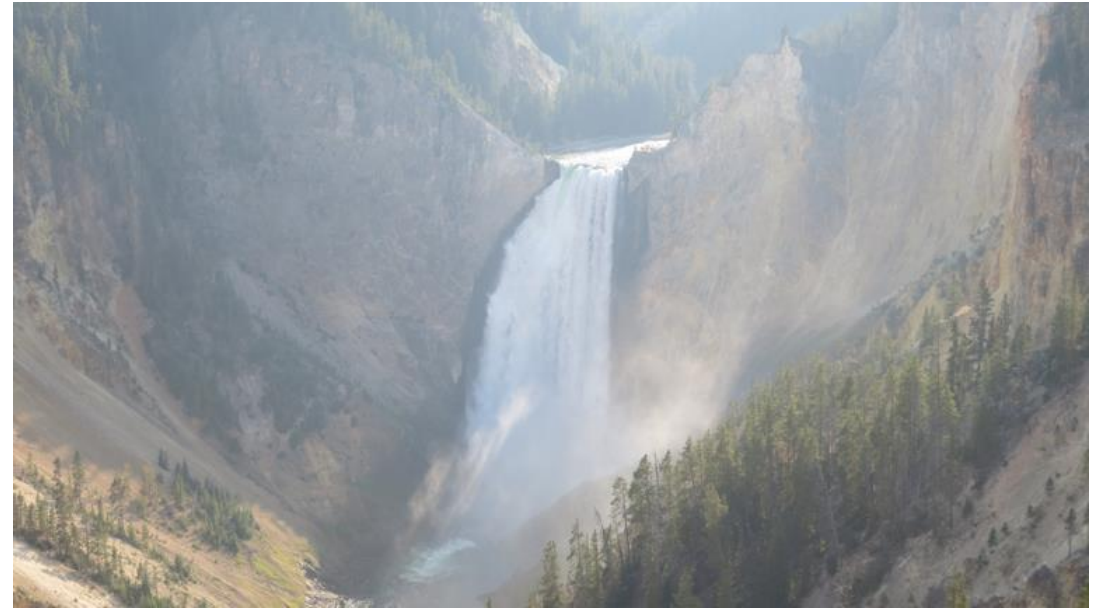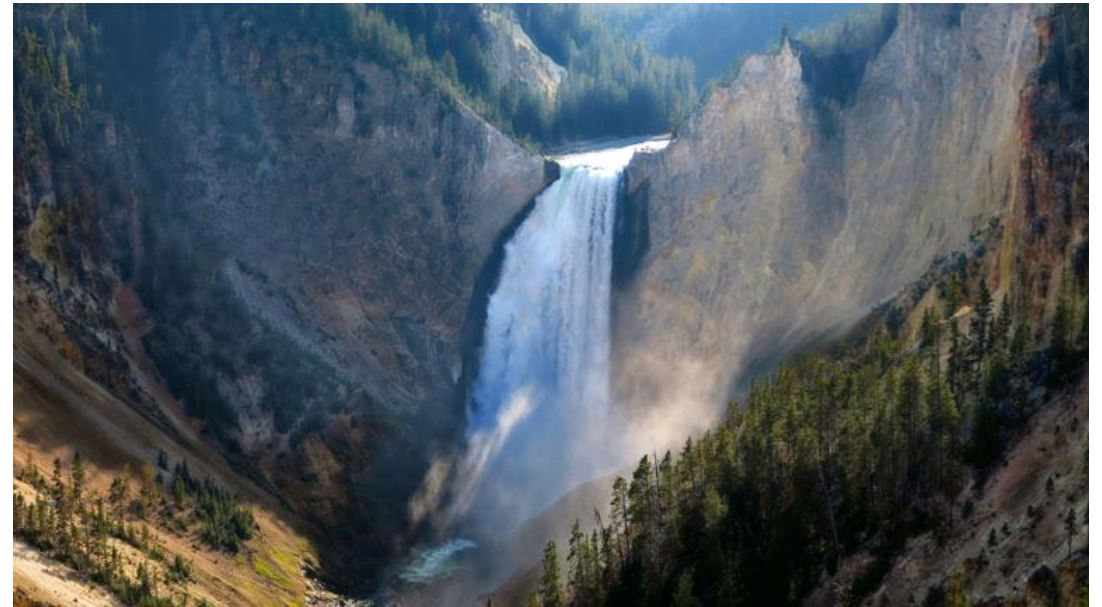

# Discriminative Network

Input

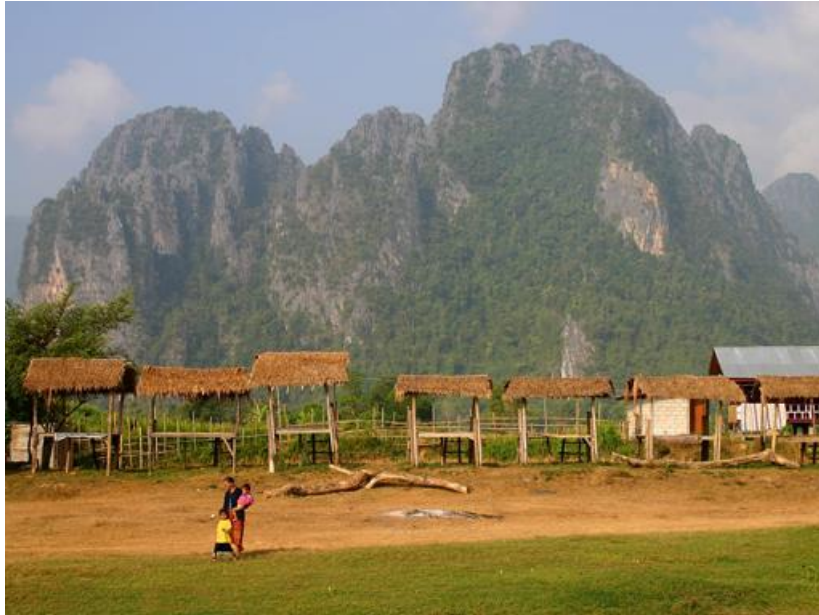

Without D

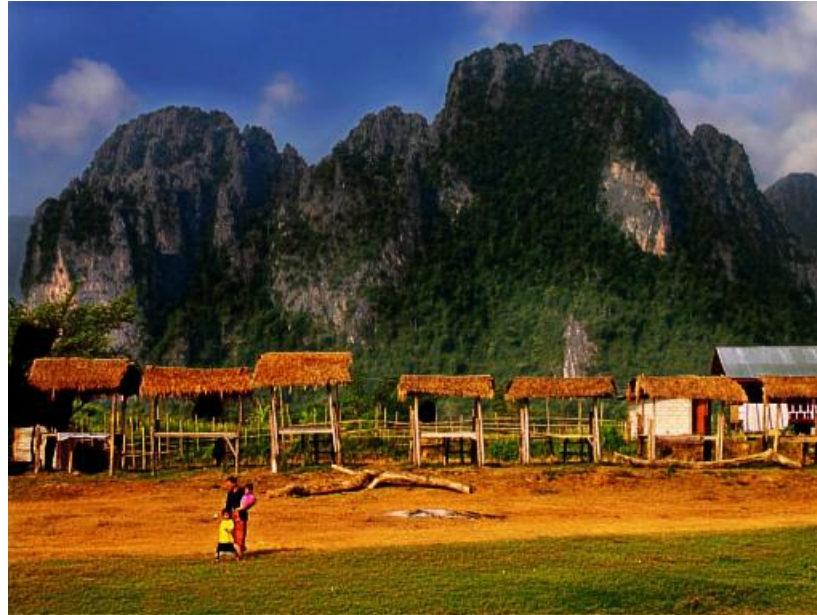

With D

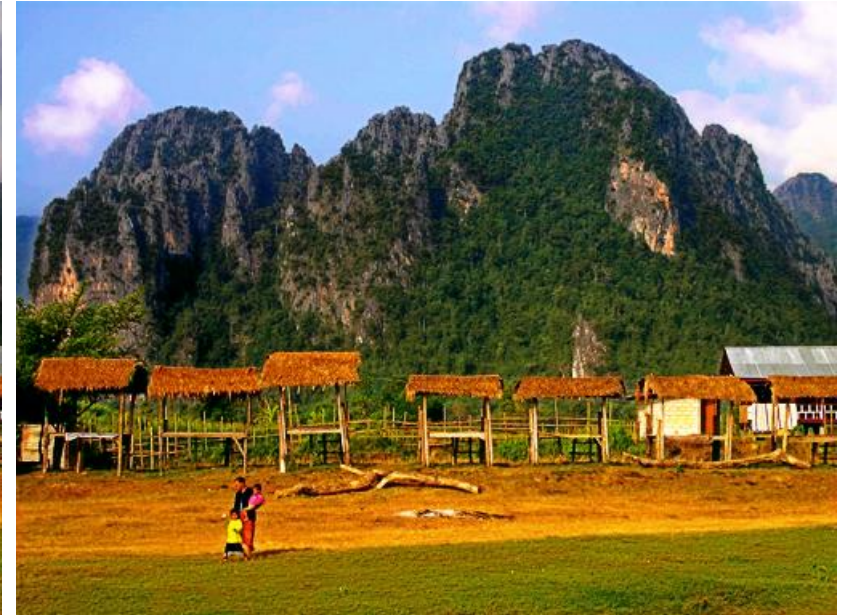

# Post processing module H

Input

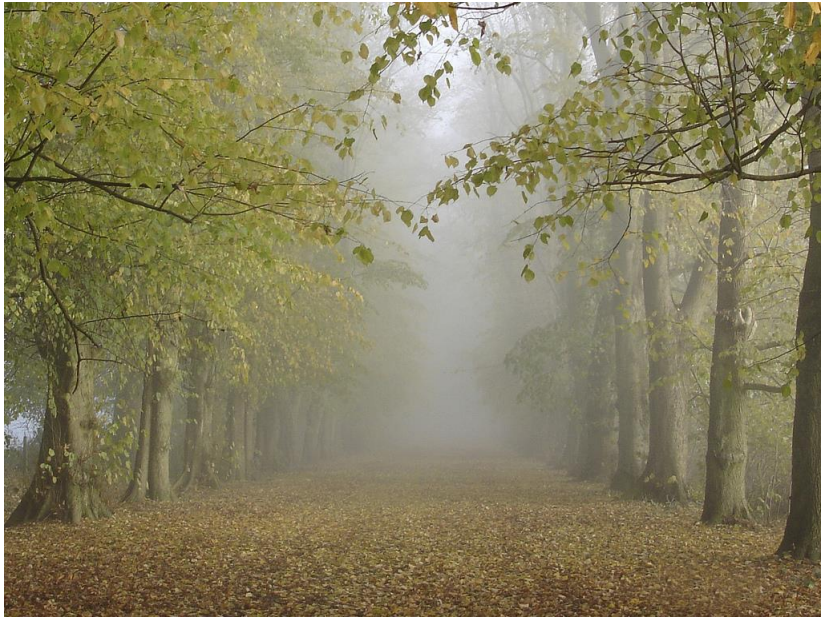

Without H

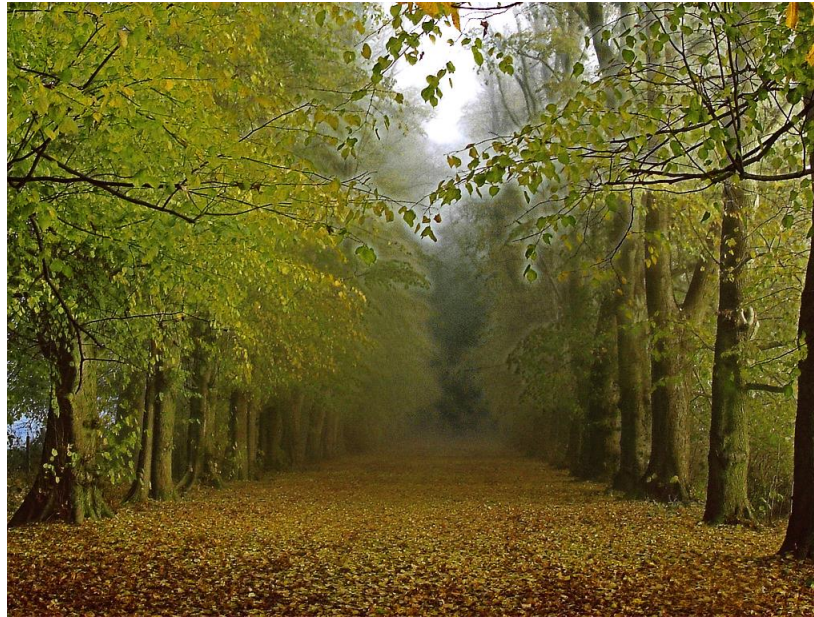

With H

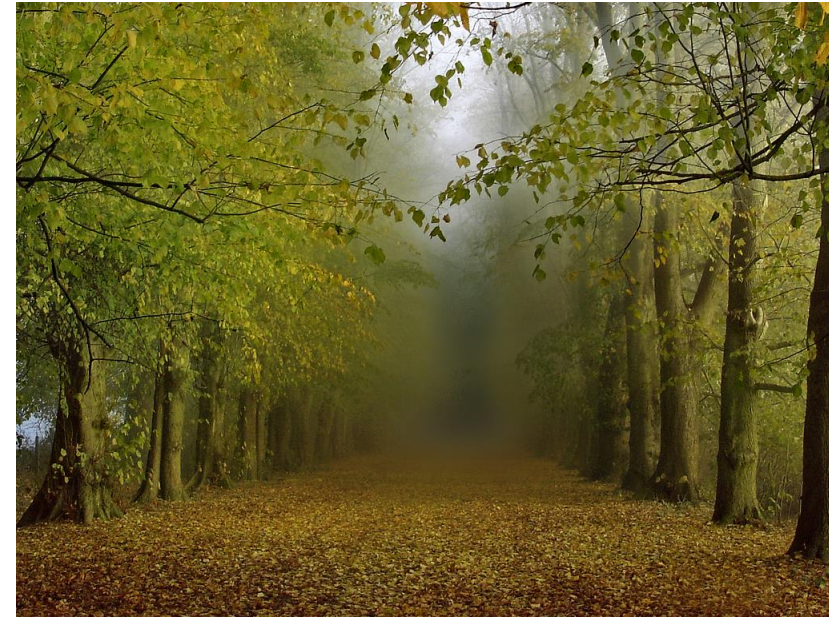

# Adaptive perceptual loss function

Input

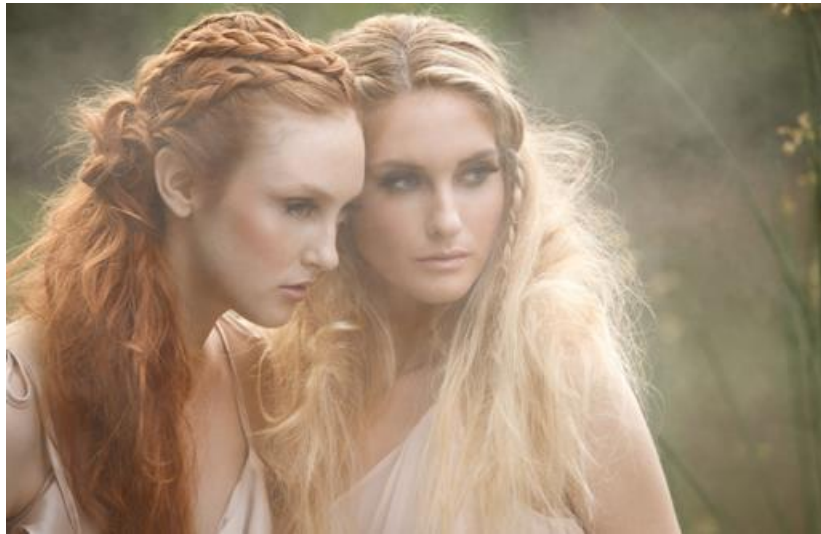

With fixed weights

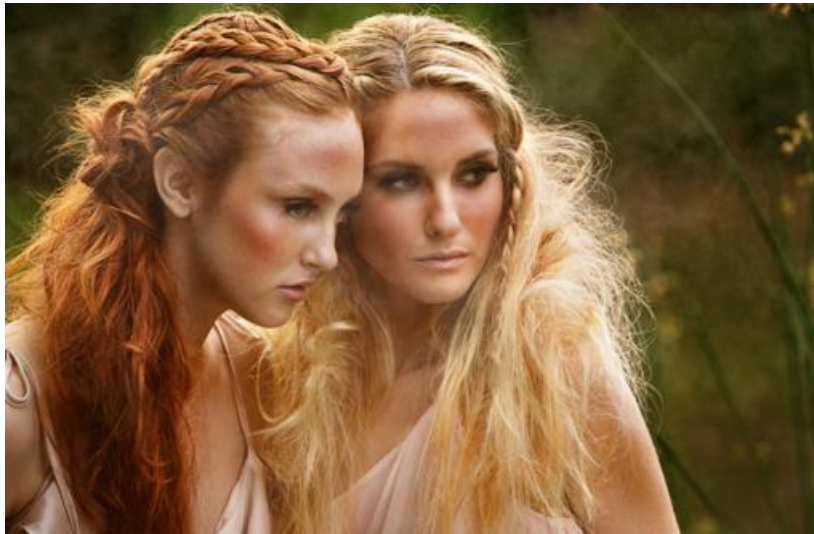

With adaptive weights

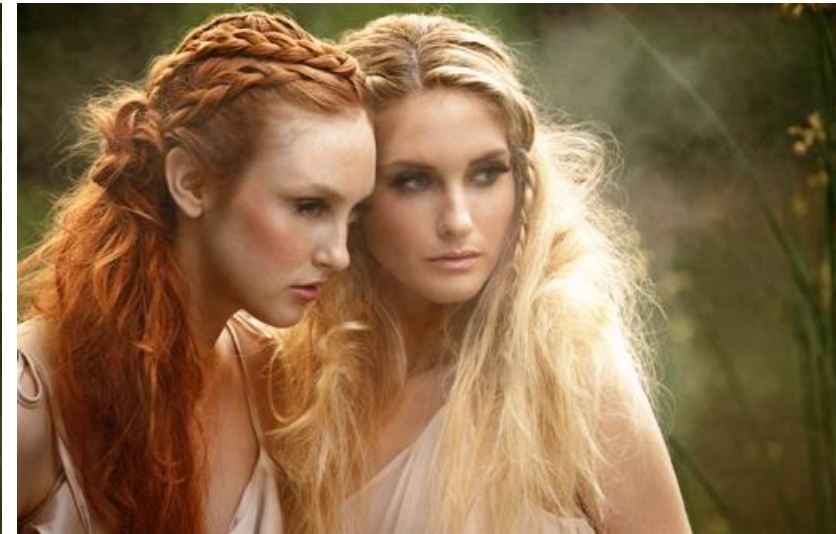

# Compare against state-of-the-art

Input

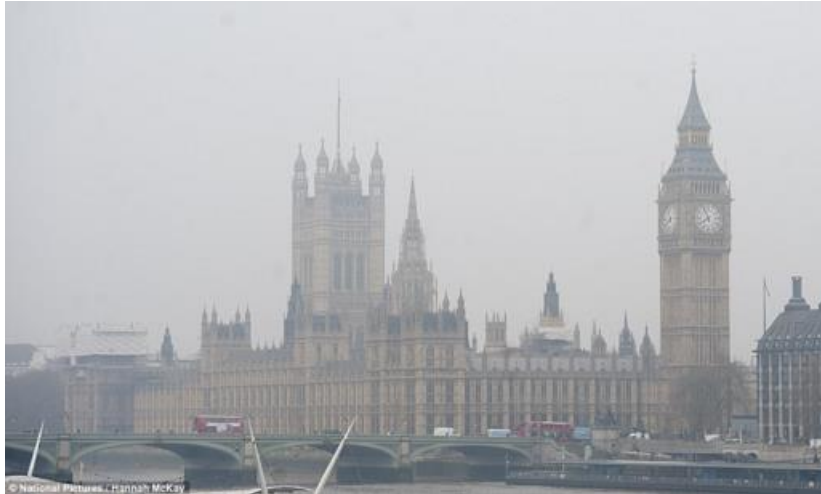

DCP [1]

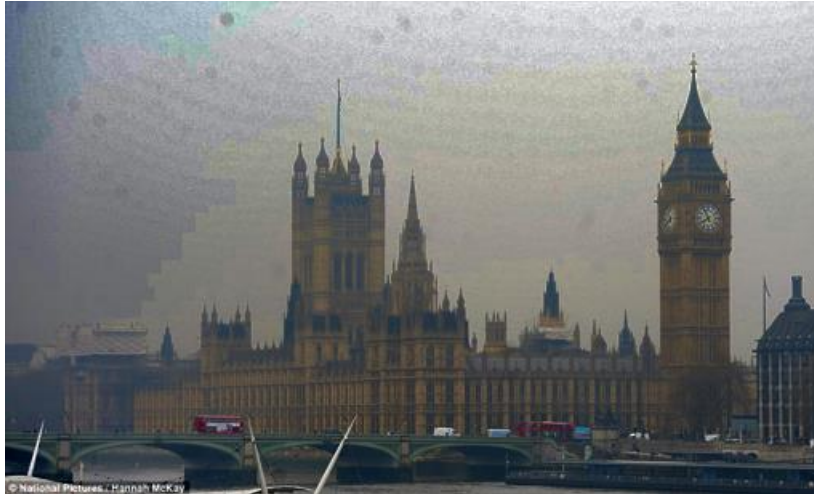

Ours

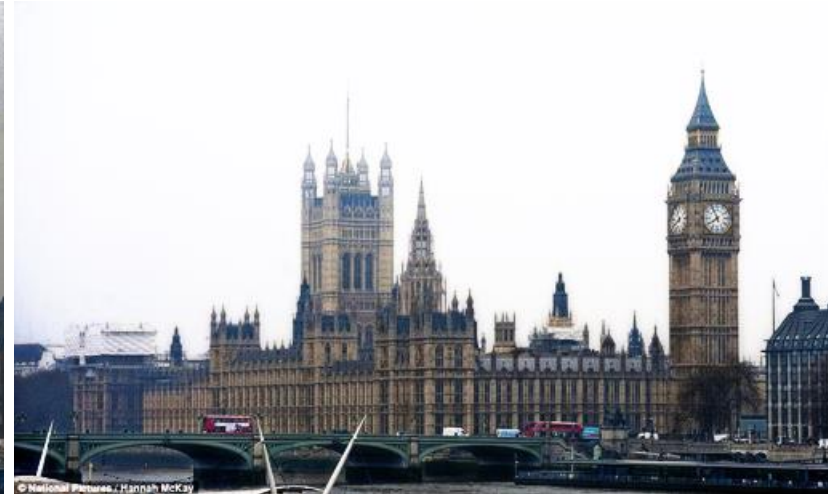

Input

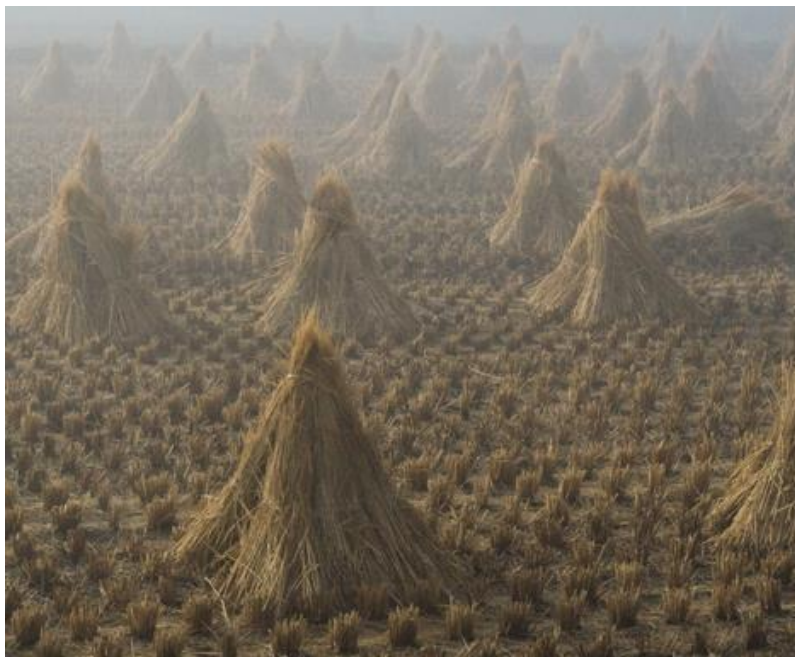

AOD [6]

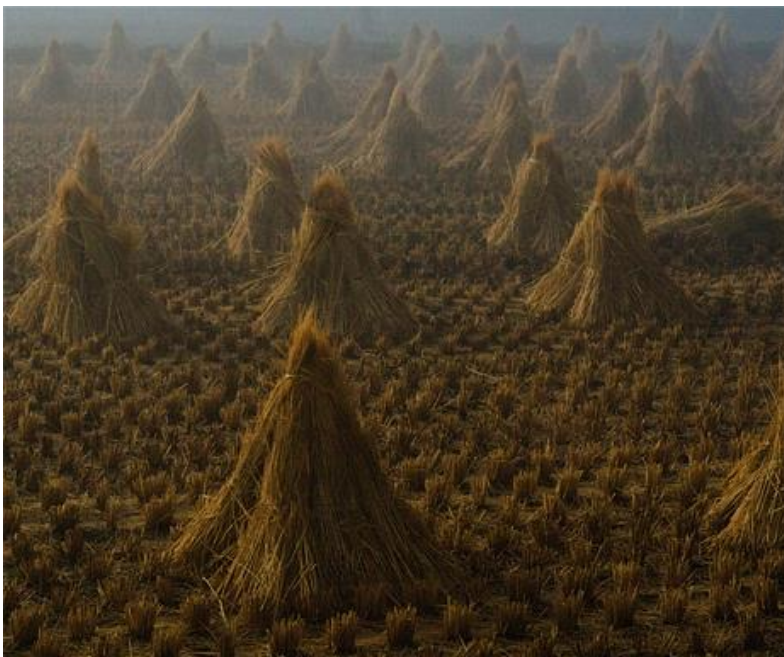

Ours

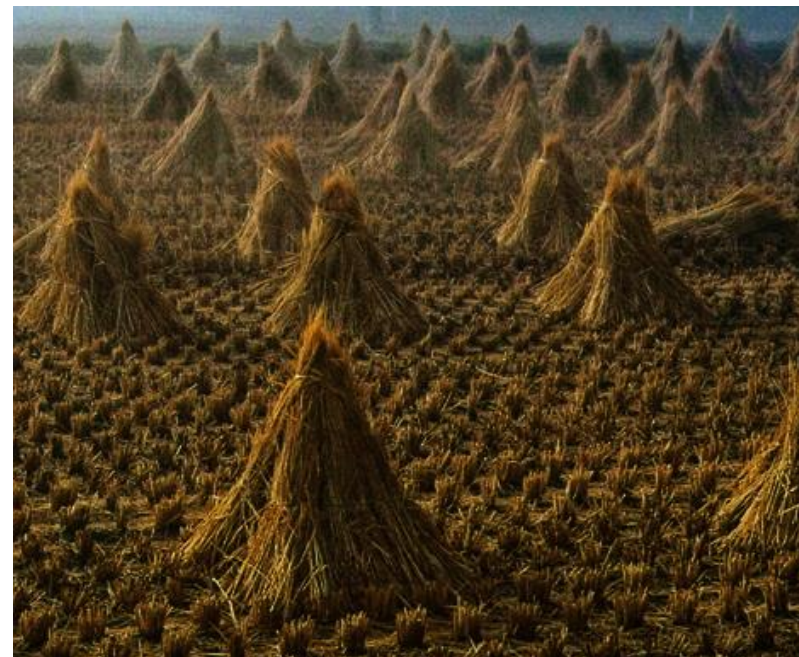

Input

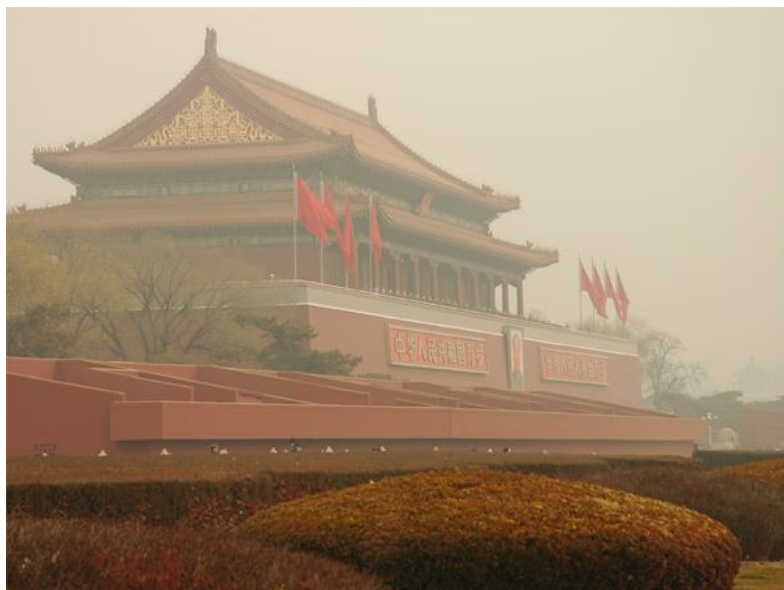

DehazeNet [5]

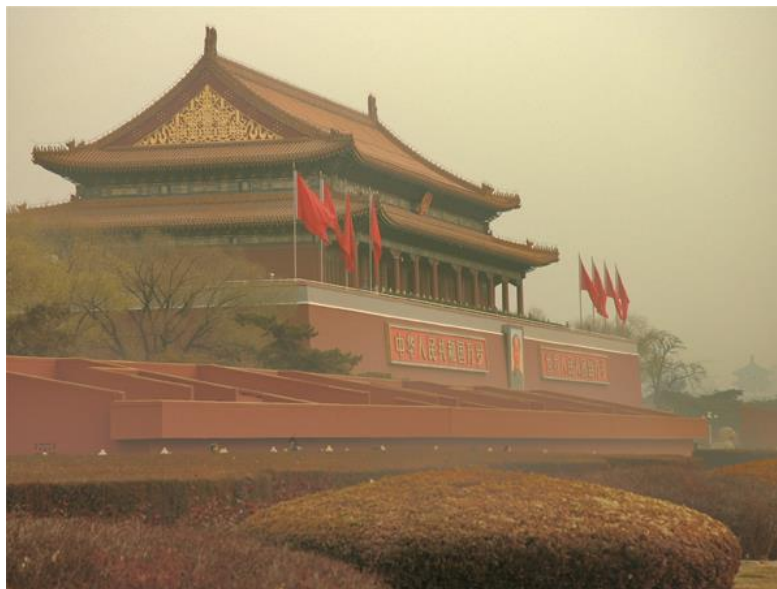

Ours

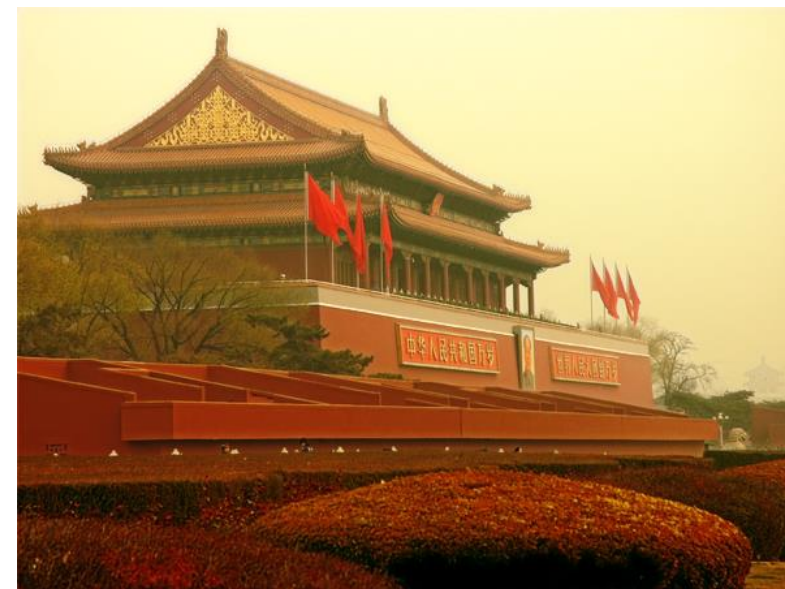

Input

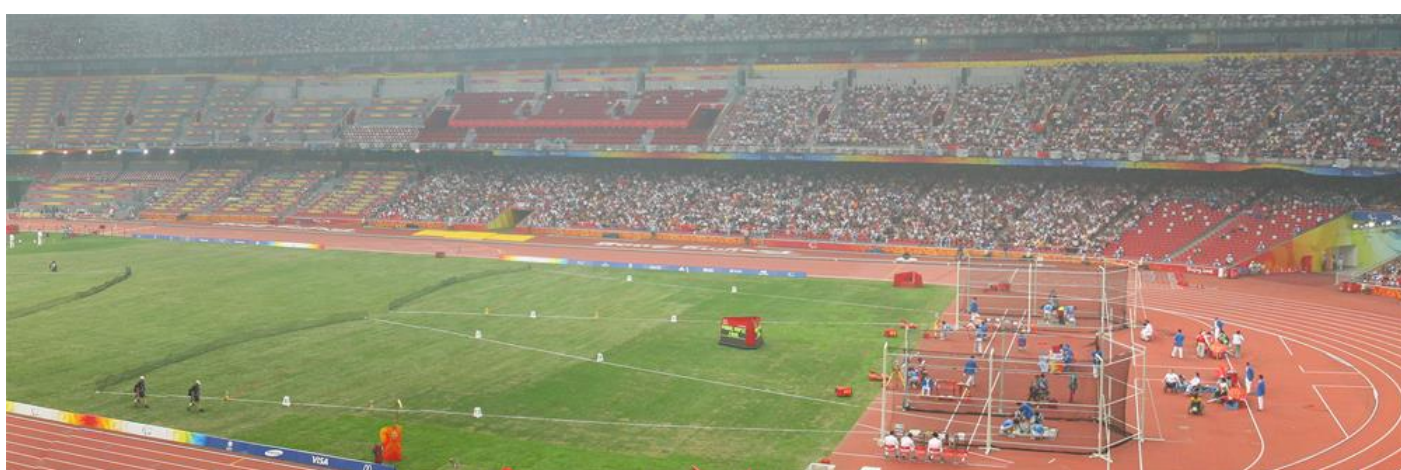

MSCNN [4]

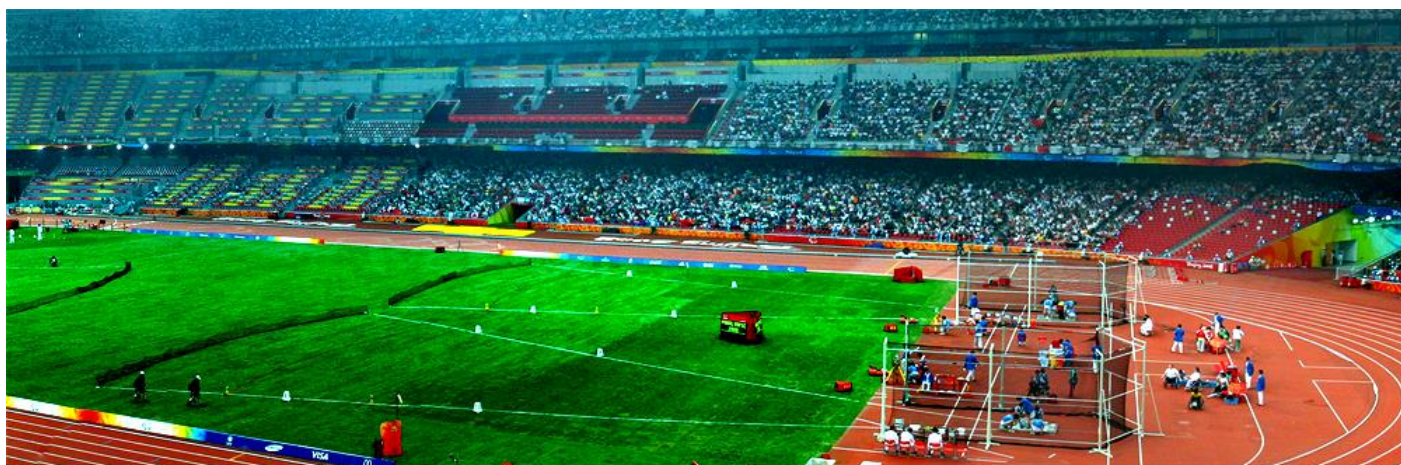

Ours

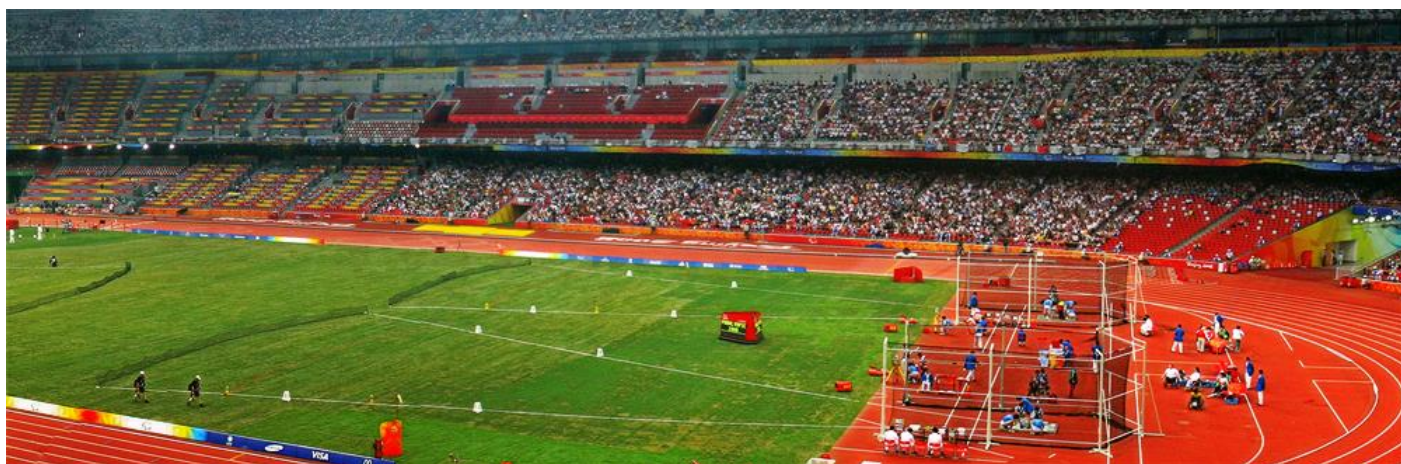

Input

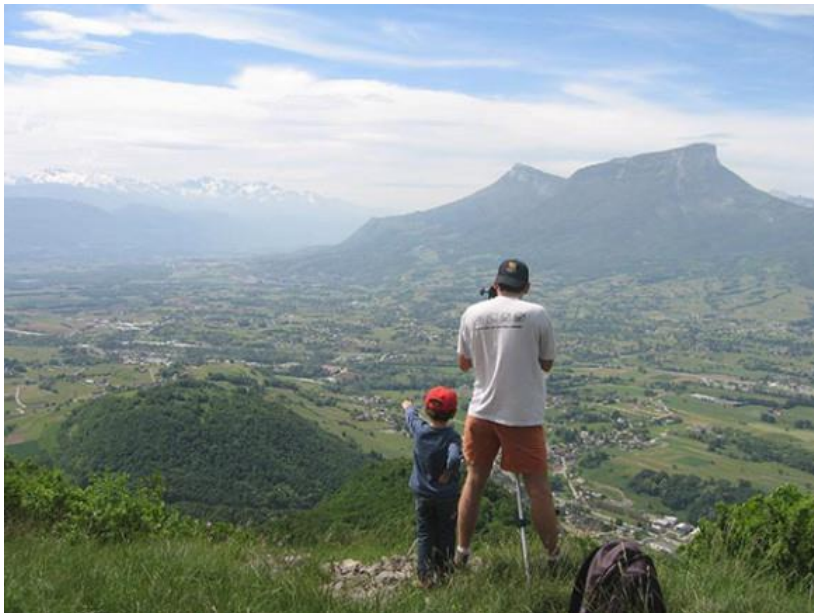

BCCR [2]

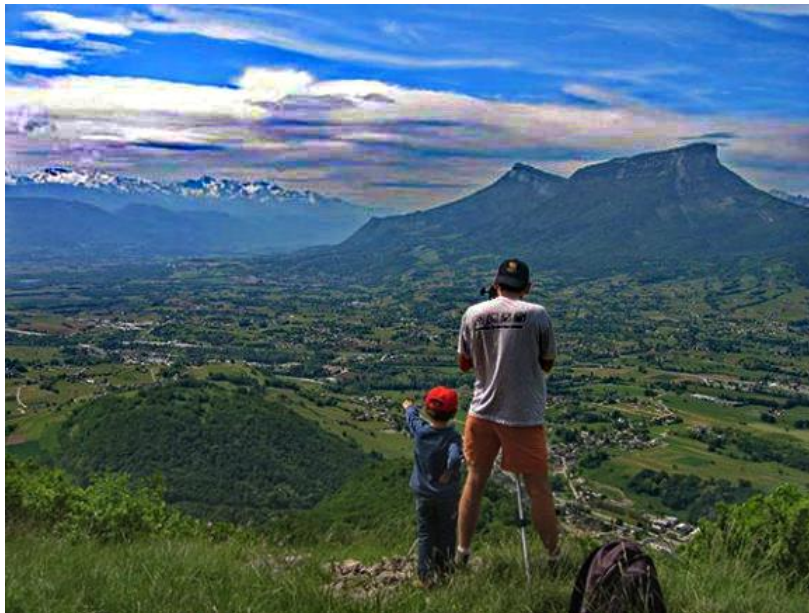

Ours

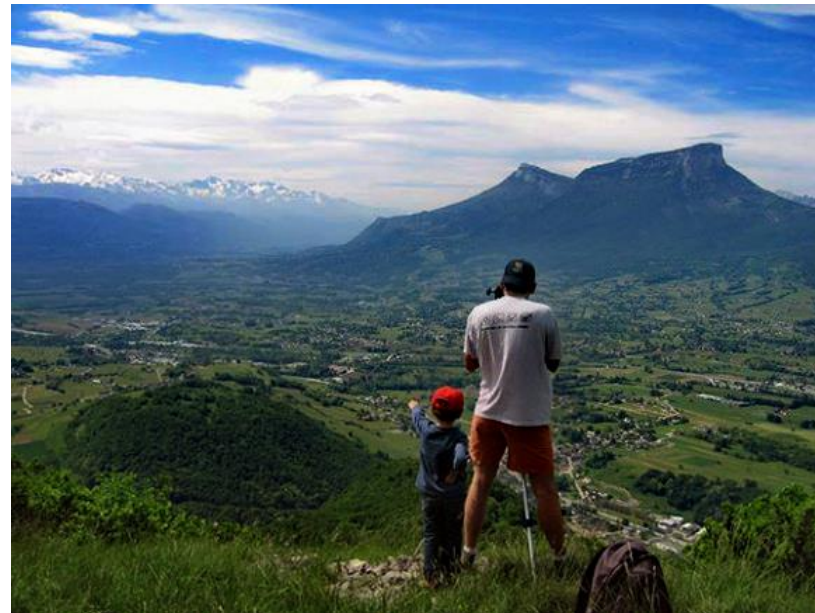

Input

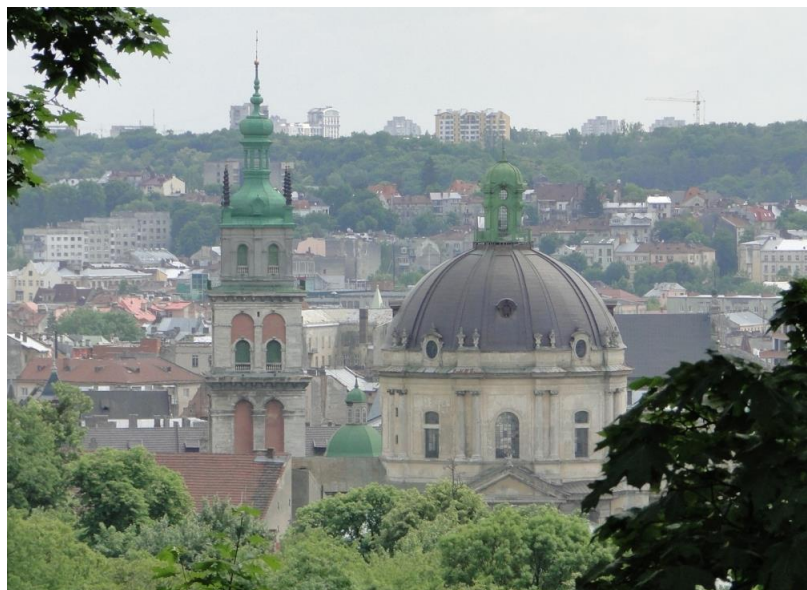

NLD [3]

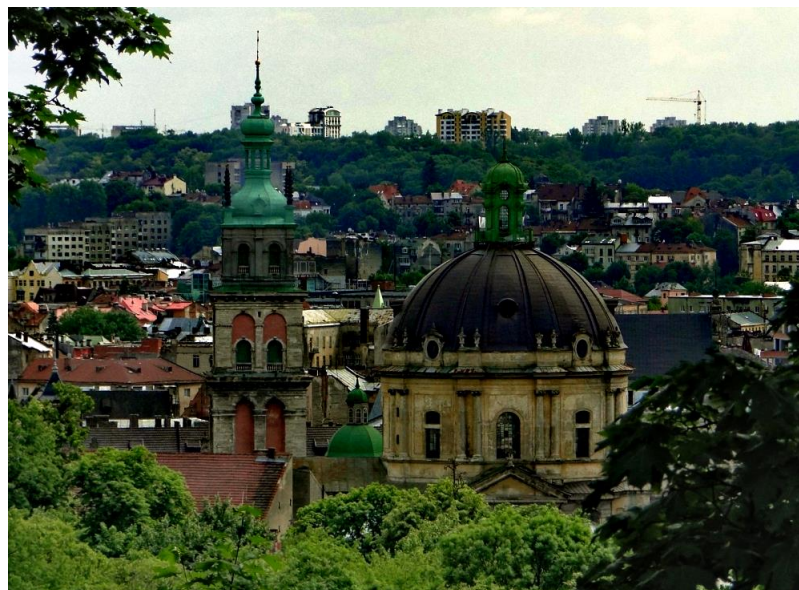

Ours

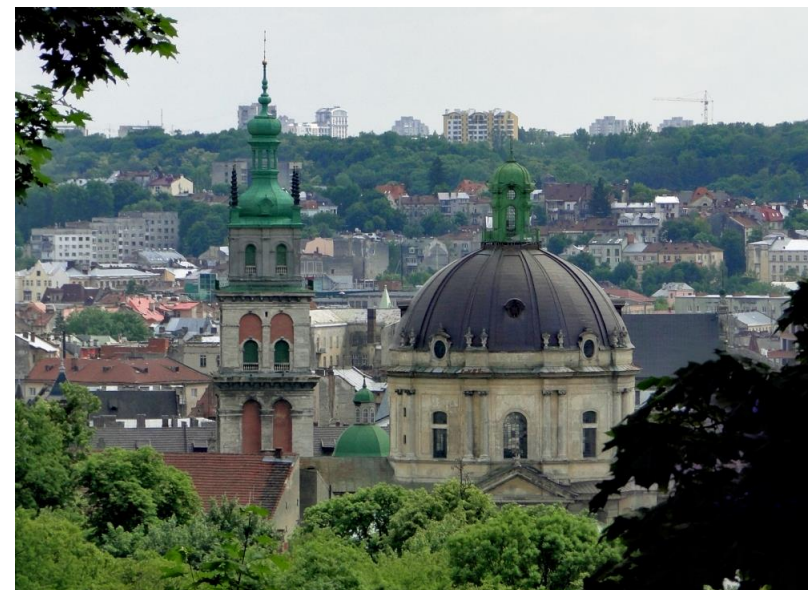

Input

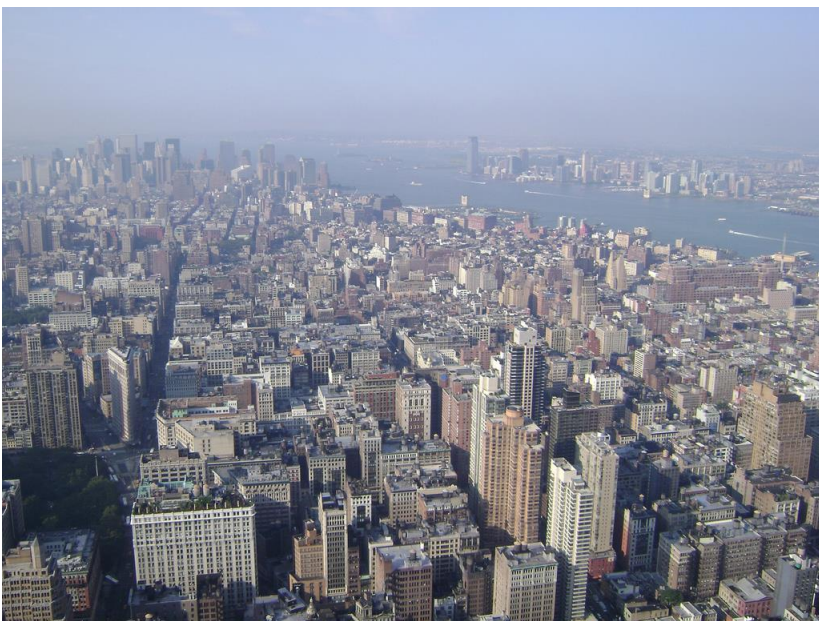

GFN [7]

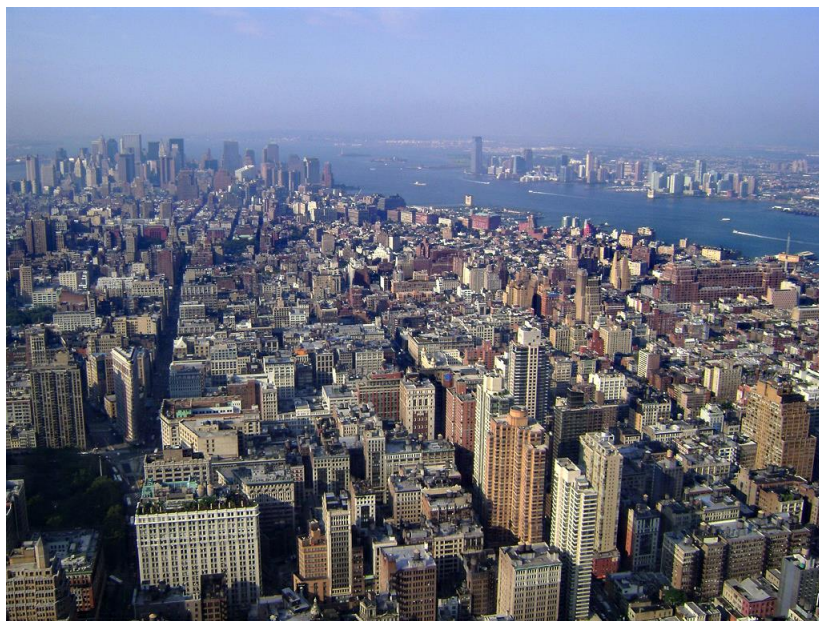

Ours

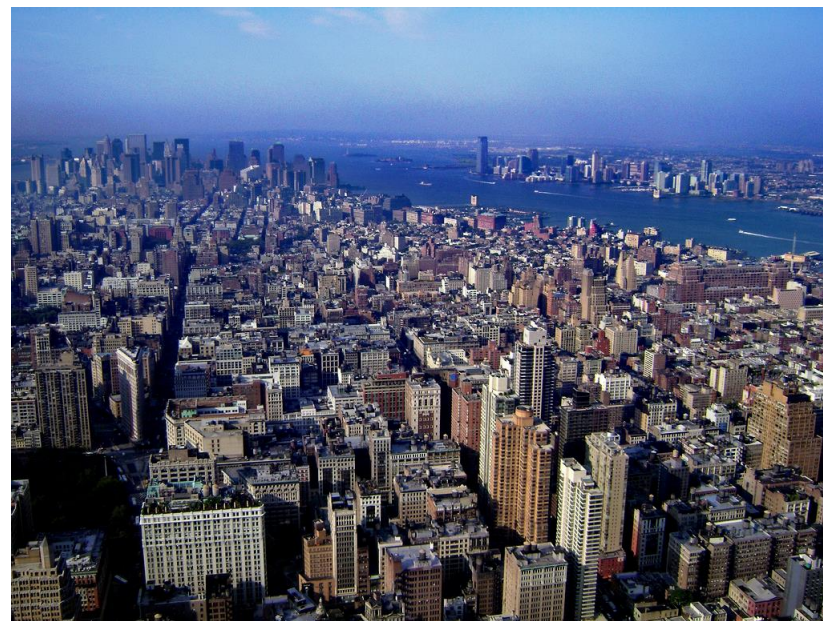

Input

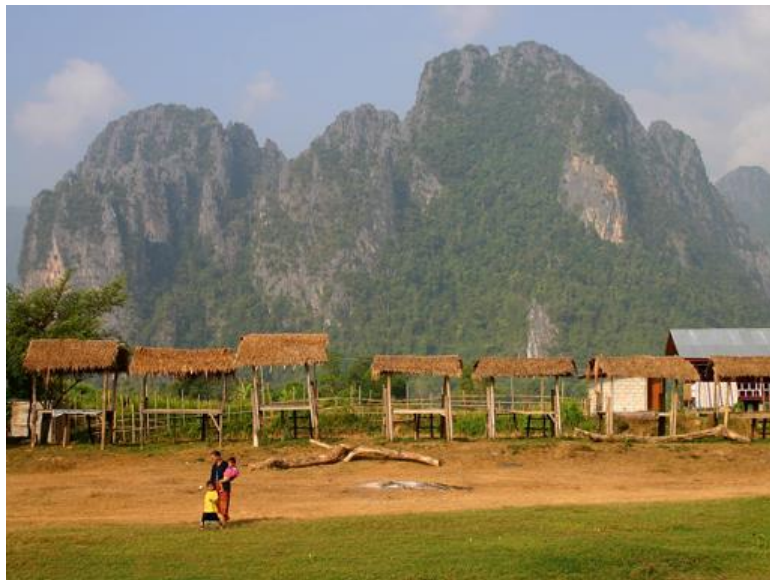

DCPDN [8]

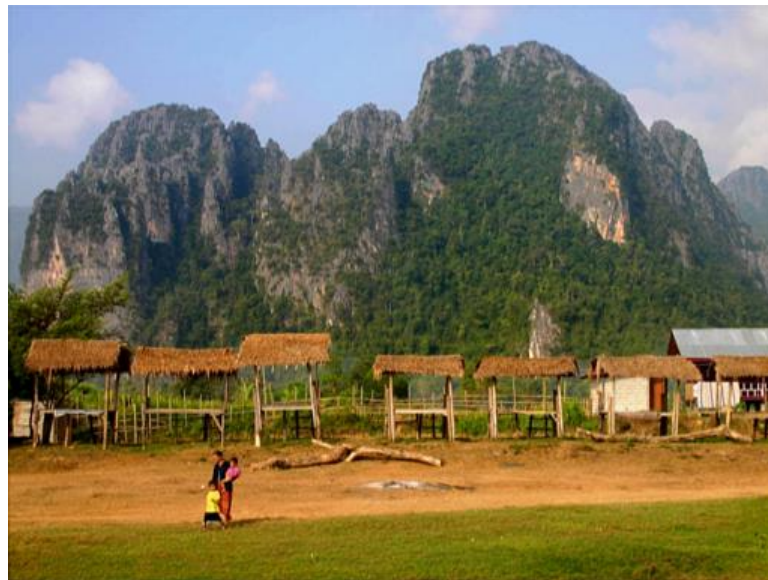

Ours

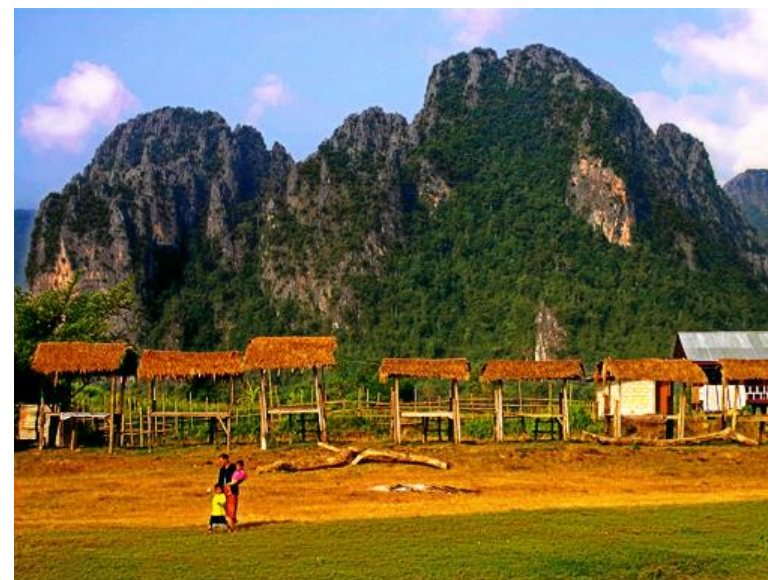

Input

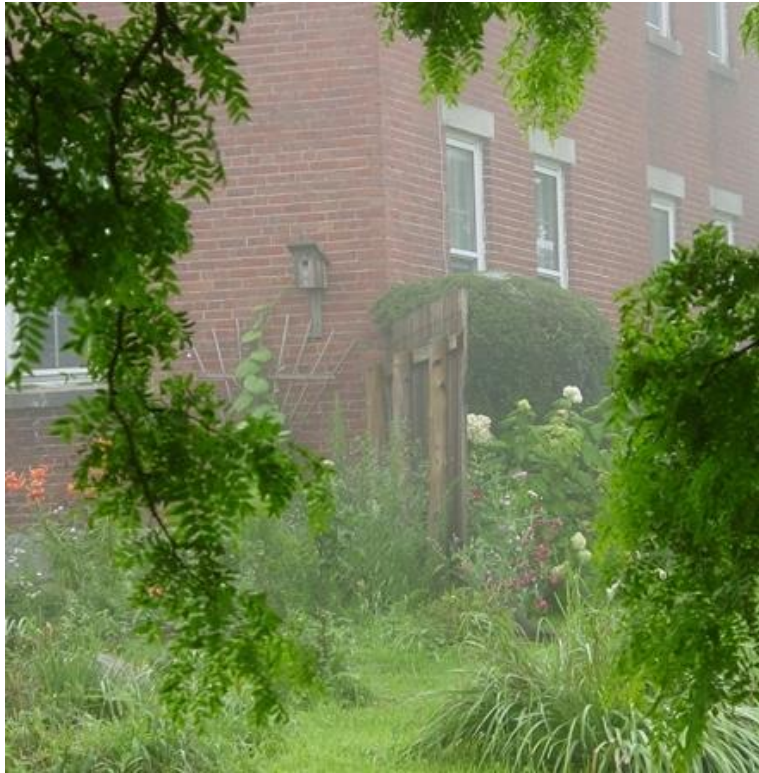

cGAN [9]

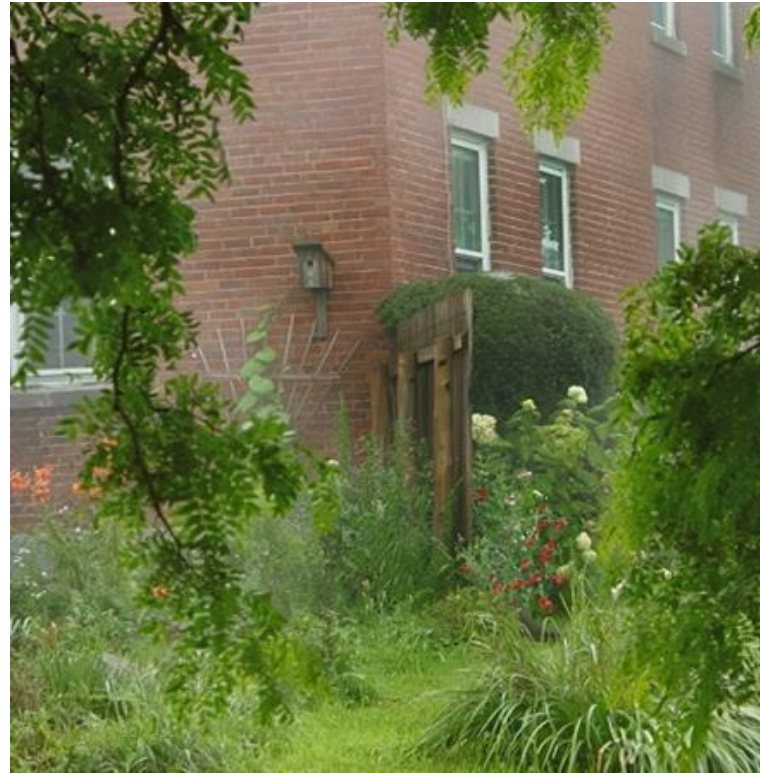

Ours

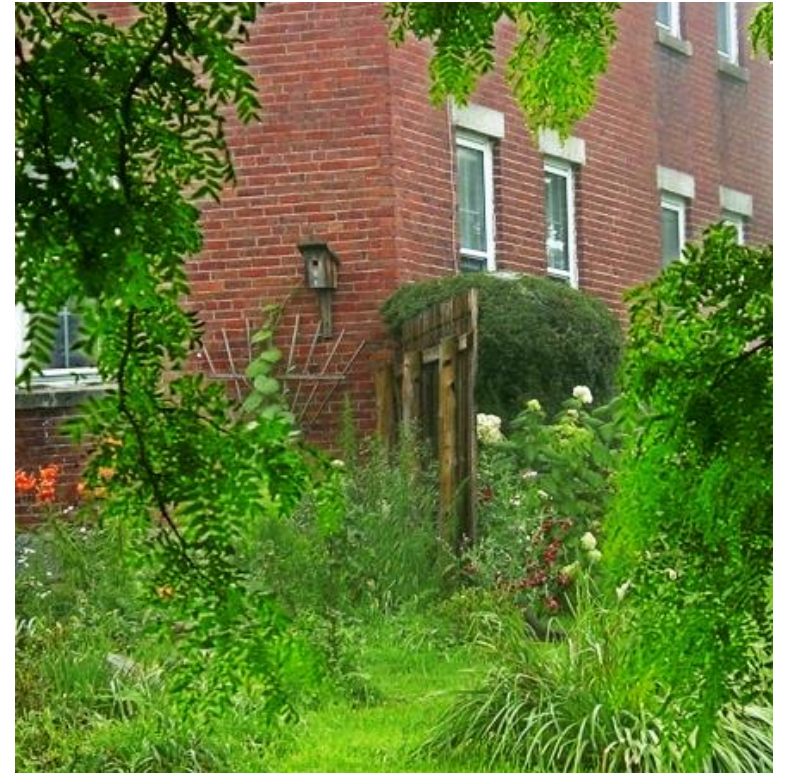

# References

- [1] He K, Sun J, Tang X. Single image haze removal using dark channel prior. IEEE transactions on pattern analysis and machine intelligence. 2011 Dec;33(12):2341-53.
- [2] Meng G, Wang Y, Duan J, Xiang S, Pan C. Efficient image dehazing with boundary constraint and contextual regularization. In Proceedings of the IEEE international conference on computer vision 2013 (pp. 617-624).
- [3] Berman D, Avidan S. Non-local image dehazing. In Proceedings of the IEEE conference on computer vision and pattern recognition 2016 (pp. 1674-1682).
- [4] Ren W, Liu S, Zhang H, Pan J, Cao X, Yang MH. Single image dehazing via multi-scale convolutional neural networks. In European conference on computer vision 2016 Oct 8 (pp. 154-169). Springer, Cham.
- [5] Cai B, Xu X, Jia K, Qing C, Tao D. Dehazenet: An end-to-end system for single image haze removal. IEEE Transactions on Image Processing. 2016 Nov;25(11):5187-98.
- [6] Li B, Peng X, Wang Z, Xu J, Feng D. Aod-net: All-in-one dehazing network. In Proceedings of the IEEE International Conference on Computer Vision 2017 Oct 1 (Vol. 1, No. 4, p. 7).
- [7] Ren W, Ma L, Zhang J, Pan J, Cao X, Liu W, Yang MH. Gated fusion network for single image dehazing. arXiv preprint arXiv:1804.00213. 2018 Mar 31.
- [8] Zhang H, Patel VM. Densely connected pyramid dehazing network. In The IEEE Conference on Computer Vision and Pattern Recognition (CVPR) 2018 Jun.
- [9] Li R, Pan J, Li Z, Tang J. Single Image Dehazing via Conditional Generative Adversarial Network. methods. 2018;3:24.
